# Supplementary material for: Cellular and Molecular Targets of Nucleotide-Tagged Trithiolato-Bridged Arene Ruthenium Complexes in the Protozoan Parasites Toxoplasma gondii and Trypanosoma brucei
Source: MDPI journal article supplement (doi:10.3390/ijms221910787), 2021-10-05

# *Trypanosoma brucei* OD62 binding proteins interaction mapping by STRING

## Network statistics

number of nodes: 22  
number of edges: 17  
average node degree: 1.55  
avg. local clustering coeff.: 0.483  
expected number of edges: 10  
PPI enrichment p-value: 0.0315

ATP synthase

Translation

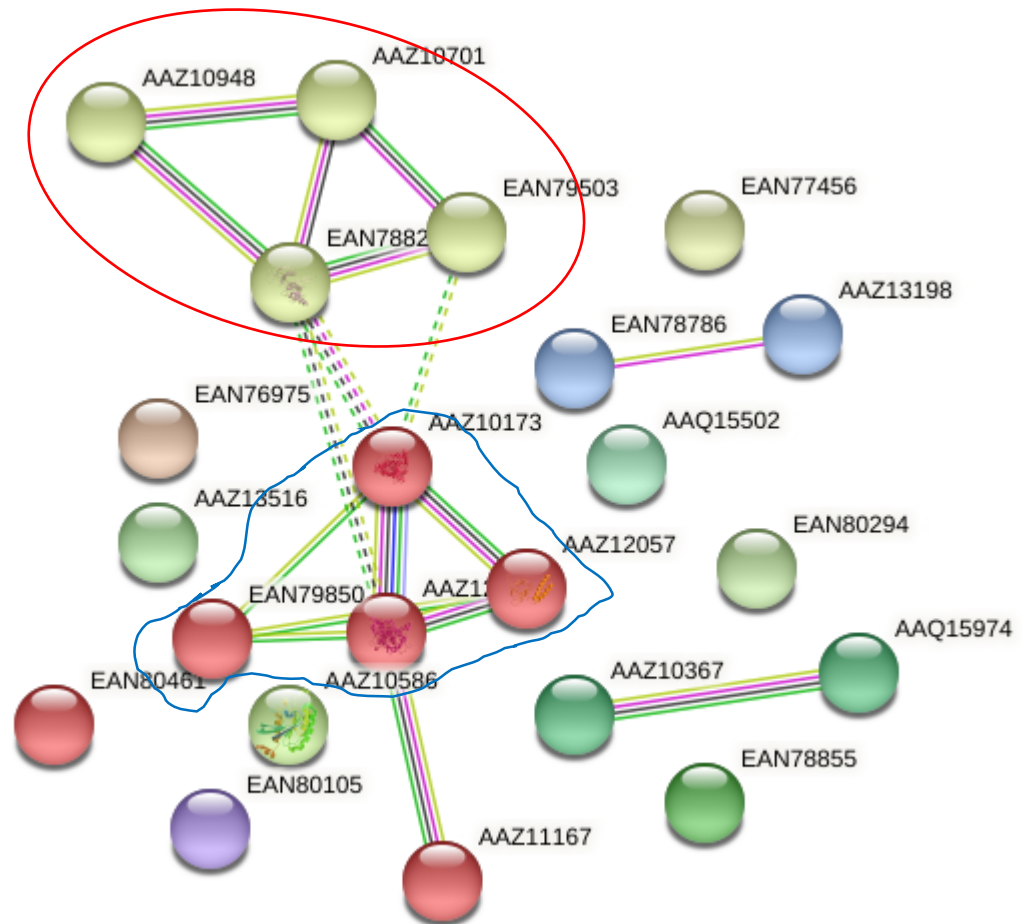

Supplement: s1 [file s1]
